# Supplementary material for: Tuning the electronic structure of BaTiO3 for an enhanced photocatalytic performance using cation–anion codoping: a first-principles study
Source: Royal Society of Chemistry journal article supplement (doi:10.1039/d1nj00283j), 2021-01-01
Supplement: d1nj00283j1.pdf [file d1nj00283j1.pdf]

## Supporting information for:

### **Tuning electronic structure of BaTiO<sub>3</sub> for enhanced photocatalytic performance using cation-anion codoping: A first-principles study**

Yumeng Fo<sup>a</sup>, Yanxia Ma<sup>a</sup>, Hao Dong<sup>b,\*</sup>, Xin Zhou<sup>a,\*</sup>

<sup>a</sup> *College of Environment and Chemical Engineering, Dalian University, Dalian  
116622, Liaoning, China*

<sup>b</sup> *School of Chemistry and Chemical Engineering, Liaoning Normal University, Dalian  
116029, Liaoning, China*

\* Corresponding authors.

*E-mail addresses:* [zhouxin@dlu.edu.cn](mailto:zhouxin@dlu.edu.cn) (X. Zhou), [sinodonghao@gmail.com](mailto:sinodonghao@gmail.com) (H. Dong)

**Table S1.** Calculated formation energies (in eV) for TM/X monodoped BaTiO<sub>3</sub> under O-rich and Ti-rich growth conditions.

| <b>E<sub>form</sub> (2×2×2)</b> | <b>TM/X</b> | <b>Ti-rich</b> | <b>O-rich</b> |
|---------------------------------|-------------|----------------|---------------|
| <b>TM@Ti</b>                    | V           | 2.06           | -13.12        |
|                                 | Nb          | 1.04           | -14.14        |
|                                 | Ta          | -0.06          | -15.24        |
|                                 | Mo          | 3.45           | -11.73        |
|                                 | W           | 2.63           | -12.55        |
| <b>X@O</b>                      | N           | -5.07          | -0.01         |
|                                 | C           | -4.68          | 0.38          |

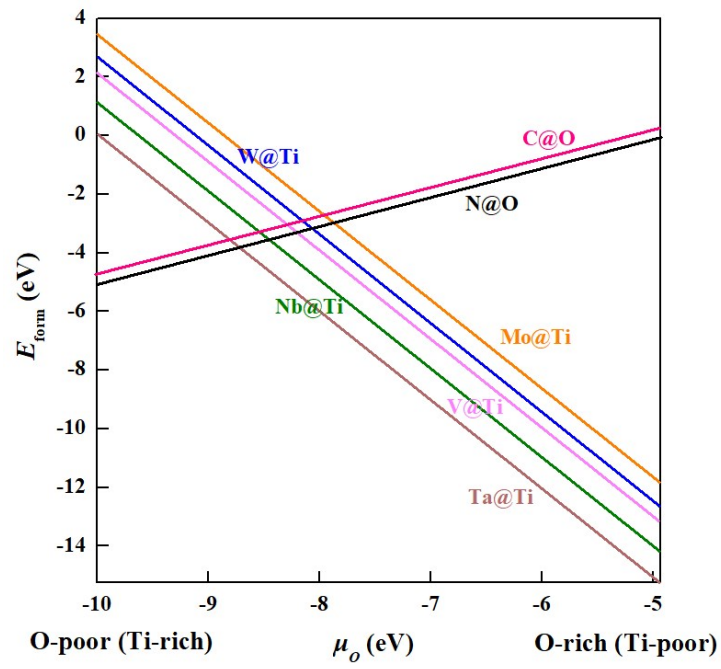

**Fig. S1.** Formation energies (eV)  $E_{\text{form}}$  as a function of the oxygen chemical potential for N-, C-, V-, Nb-, Ta-, Mo-, and W-monodoped BaTiO<sub>3</sub>.

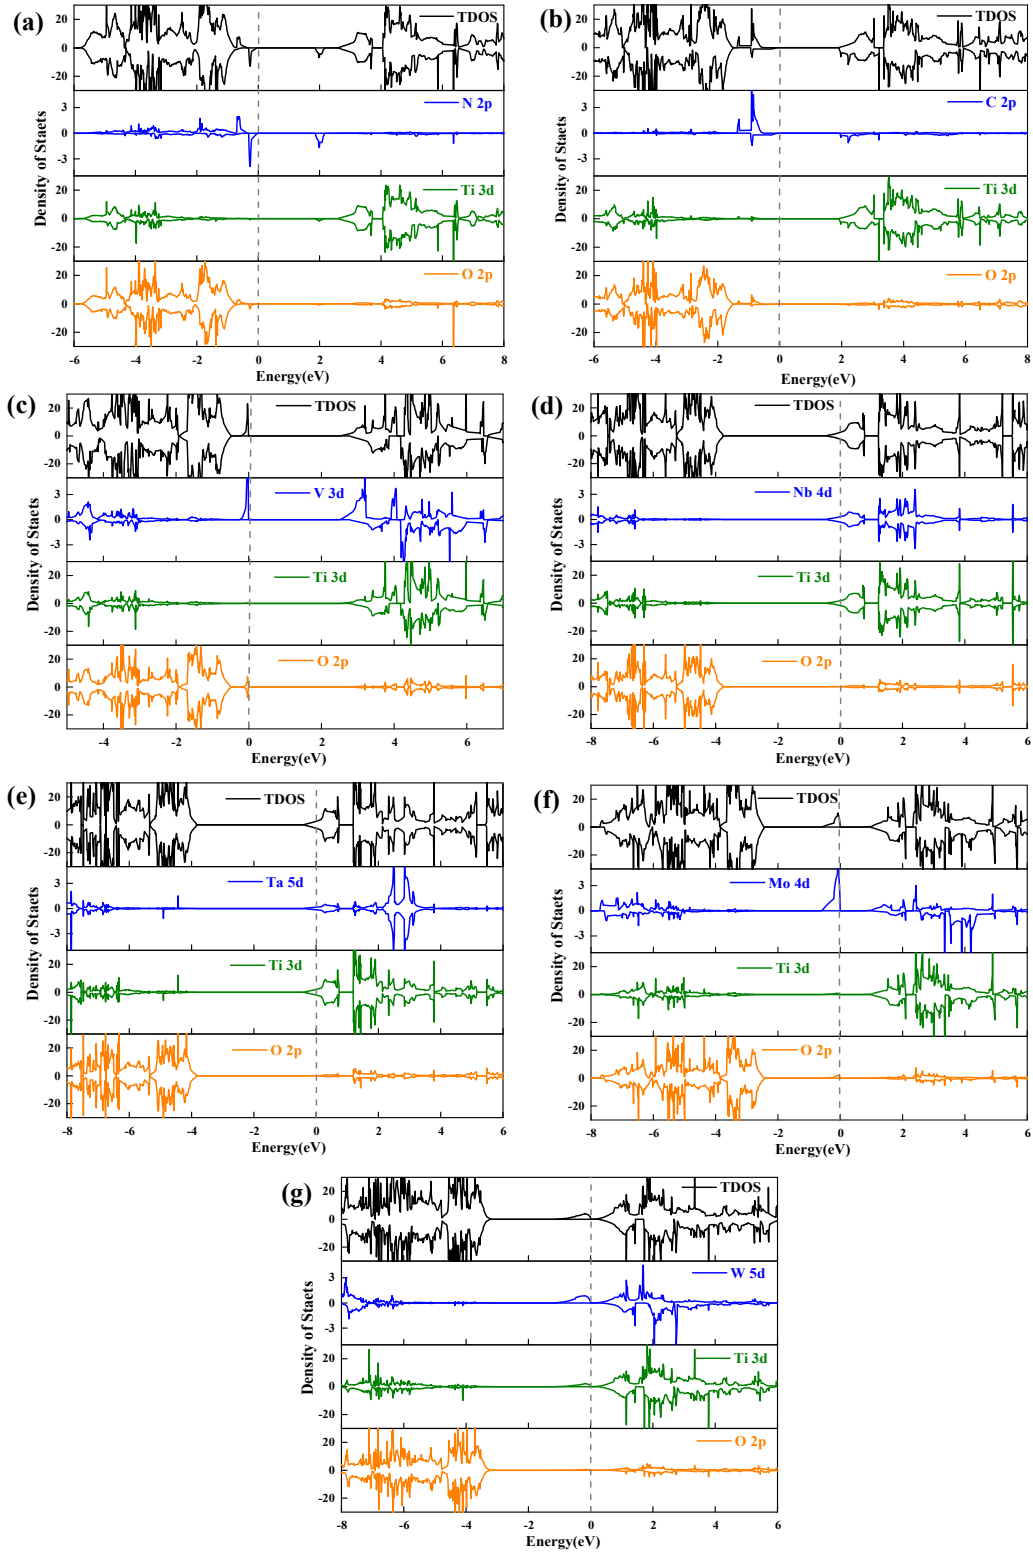

**Fig. S2.** The calculated density of states for (a) N-doped, (b) C-doped (c) V-doped, (d) Nb-doped, (e) Ta-doped, (f) Mo-doped and (g) W-doped BaTiO<sub>3</sub>. The dashed line is the Fermi level.

**Table S2.** The fully optimized crystal parameters and band gaps of (TM+X)-codoped BaTiO<sub>3</sub>

|       | Relaxed parameters |        |        | Band gap |
|-------|--------------------|--------|--------|----------|
|       | a                  | b      | c      |          |
| V-N   | 8.1425             | 7.9659 | 7.9659 | 3.04     |
| Nb-N  | 8.1437             | 8.0141 | 8.0141 | 3.03     |
| Ta-N  | 8.1035             | 8.0163 | 8.0163 | 2.79     |
| Mo-N  | 8.0975             | 8.0094 | 8.0094 | 3.24     |
| W-N   | 8.0621             | 8.0142 | 8.0142 | 2.88     |
| Mo-C  | 8.2046             | 7.9919 | 7.9919 | 2.44     |
| W-C   | 8.1991             | 7.9899 | 7.9899 | 2.18     |
| Mo-2N | 8.0193             | 8.0266 | 8.0266 | 1.56     |
| W-2N  | 8.0230             | 8.0237 | 8.0237 | 1.78     |

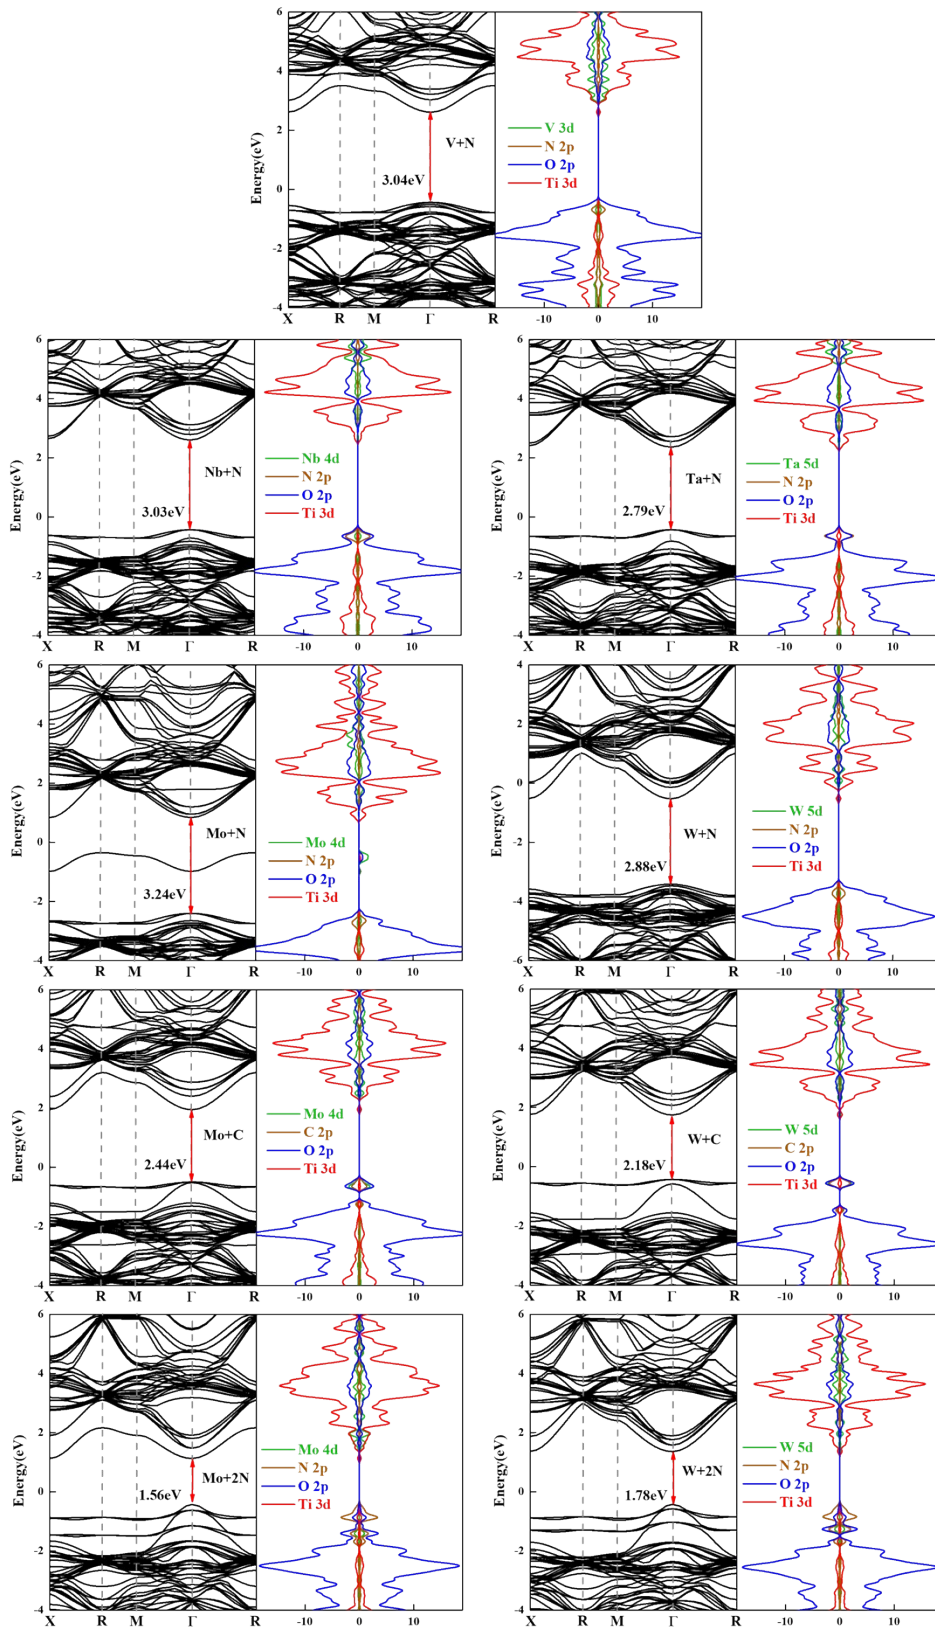

**Figure S3.** Computed band structure and density of states for fully relaxed (TM+X)-codoped BaTiO<sub>3</sub>
